# Supplementary material
Source: PubMed Central journal article supplement (PMC4552322)

Suppl.  
Fig. 1

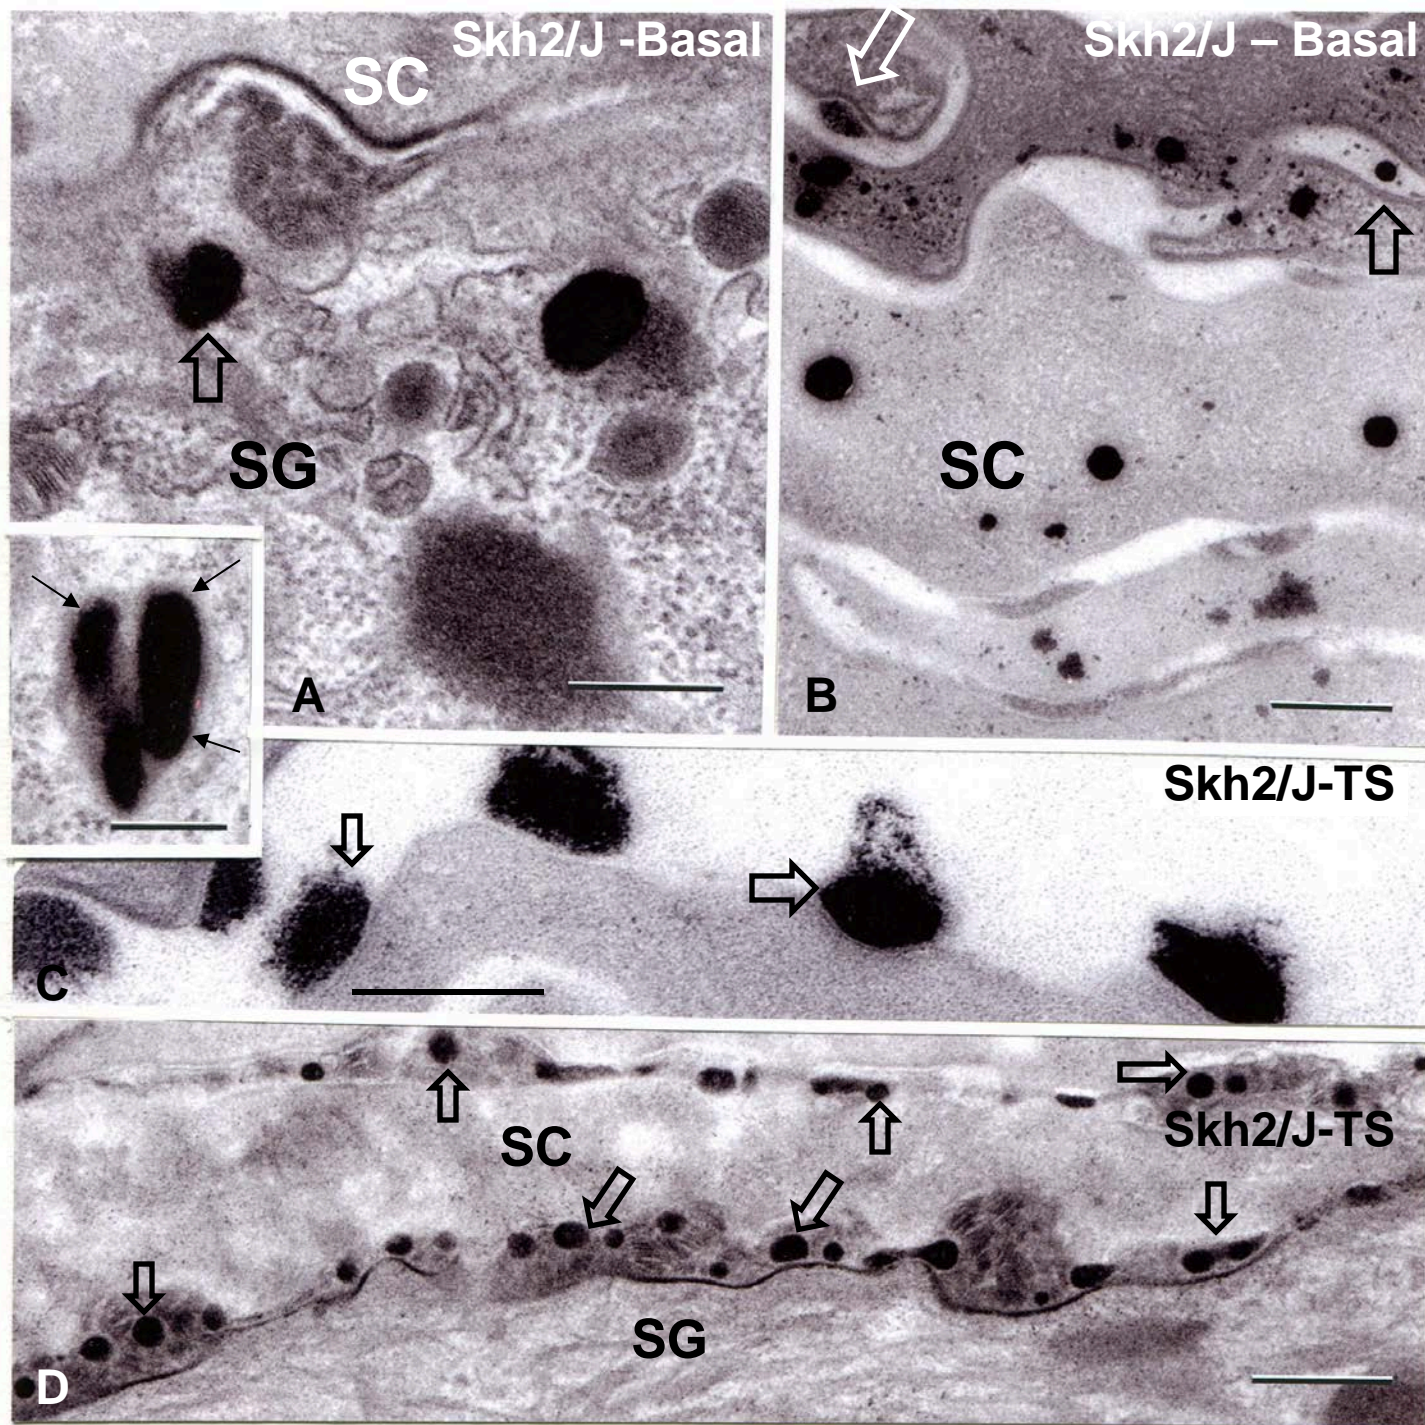

Supplement: NIHMS716070-supplement-Suppl_Material.pdf [file NIHMS716070-supplement-Suppl_Material.pdf]
